# Supplementary material
Source: PubMed Central journal article supplement (PMC4493439)
Supplement: NIHMS701913-supplement-Supplementary_Information.pdf [file NIHMS701913-supplement-Supplementary_Information.pdf]

# Supplementary Information

## Protein quality control at the inner nuclear membrane

Anton Khmelinskii<sup>1,9</sup>, Ewa Blaszczak<sup>2,3,9</sup>, Marina Pantazopoulou<sup>4</sup>, Bernd Fischer<sup>5,6</sup>, Deike J. Omnus<sup>4</sup>, Gaëlle Le Dez<sup>2,3</sup>, Audrey Brossard<sup>2,3</sup>, Alexander Gunnarsson<sup>4</sup>, Joseph D. Barry<sup>5</sup>, Matthias Meurer<sup>1</sup>, Daniel Kirrmaier<sup>1</sup>, Charles Boone<sup>7</sup>, Wolfgang Huber<sup>5</sup>, Gwenaël Rabut<sup>2,3,\*</sup>, Per O. Ljungdahl<sup>4,\*</sup>, Michael Knop<sup>1,8,\*</sup>

- 1) Zentrum für Molekulare Biologie der Universität Heidelberg (ZMBH), DKFZ-ZMBH Alliance, Heidelberg, Germany
- 2) Centre National de la Recherche Scientifique, UMR 6290, Rennes, France
- 3) Institut de Génétique et Développement de Rennes, Université de Rennes 1, Rennes, France
- 4) Department of Molecular Biosciences, The Wenner-Gren Institute, Stockholm University, Stockholm, Sweden
- 5) Genome Biology Unit, European Molecular Biology Laboratory (EMBL), Heidelberg, Germany
- 6) Computational Genome Biology, German Cancer Research Center (DKFZ), Heidelberg, Germany
- 7) Department of Molecular Genetics, Donnelly Centre for Cellular and Biomolecular Research, University of Toronto, Toronto, Canada
- 8) Cell Morphogenesis and Signal Transduction, German Cancer Research Center (DKFZ), Heidelberg, Germany
- 9) These authors contributed equally to this work.

\* Corresponding authors

### **This PDF contains**

Supplementary Methods

Supplementary Notes 1 and 2

Description of Supplementary Tables 1, 2 and 3

Supplementary Tables 4 and 5

## Table of Contents

|                                                                                            |    |
|--------------------------------------------------------------------------------------------|----|
| 1. Supplementary Methods .....                                                             | 3  |
| tFT library construction: overview and workflow .....                                      | 3  |
| 1.1. Tagging strategy .....                                                                | 4  |
| 1.2. Library background strain .....                                                       | 4  |
| 1.3. Selection of ORFs .....                                                               | 4  |
| 1.4. Primers for PCR targeting of the tagging module .....                                 | 5  |
| 1.5. Amplification of the tagging module .....                                             | 6  |
| 1.6. Transformation .....                                                                  | 6  |
| 1.7. Verification primers .....                                                            | 6  |
| 1.8. Diagnostic PCR .....                                                                  | 7  |
| 1.9. Whole colony imaging .....                                                            | 8  |
| 2. Supplementary Notes .....                                                               | 9  |
| 2.1. Supplementary Note 1 .....                                                            | 9  |
| 2.2. Supplementary Note 2 .....                                                            | 9  |
| 3. Supplementary Tables .....                                                              | 10 |
| Supplementary Table 1: Correlation coefficients between genetic interaction profiles ..... | 10 |
| Supplementary Table 2: Strains in the tFT library .....                                    | 10 |
| Supplementary Table 3: Protein stability changes in screens with the tFT library .....     | 10 |
| Supplementary Table 4: Yeast strains used in this study .....                              | 11 |
| Supplementary Table 5: Plasmids used in this study .....                                   | 13 |
| 4. References .....                                                                        | 14 |

## 1. Supplementary Methods

Here we describe the construction of a genome-wide library of *S. cerevisiae* strains each expressing a different protein tagged with a tFT, hereafter referred to as tFT library.

### tFT library construction: overview and workflow

First, we selected a tFT suitable for studies of protein dynamics in this organism. The mean and median half-life of the *S. cerevisiae* proteome is ~43 min, as determined with cycloheximide chase experiments using strains expressing proteins fused to the TAP tag<sup>1</sup>. A tFT composed of the slower maturing red fluorescent protein mCherry<sup>2</sup> and the faster maturing green fluorescent protein sfGFP<sup>3</sup> can be used to study the degradation of proteins with half-lives between ~10 min and ~8 h<sup>4</sup> (see also [Supplementary Note 1](#)). The dynamics of most yeast proteins could thus be analyzed with this tFT. Therefore, we constructed a module for seamless protein tagging with the mCherry-sfGFP timer (described in [section 1.1](#)).

Second, we selected a strain background for library construction. Various genome-wide libraries of yeast strains carrying genome manipulations such as gene deletions or tagged loci have been constructed over the last fifteen years<sup>5,6</sup>. With synthetic genetic array (SGA) technology, different genome manipulations present in such libraries can be combined using automated procedures<sup>7</sup>, greatly expanding the potential applications of each individual library. Therefore, we decided to construct the tFT library in a strain background compatible with SGA. We introduced the genetic elements required for seamless protein tagging into the SGA entry strain Y8205<sup>8</sup>, generating the library background strain yMaM330 (described in [section 1.2](#)).

Third, we selected the open reading frames (ORFs) to be tagged with the tFT. We sought to reduce potential artifacts (e.g. protein mislocalization) caused by tagging and avoid tagging proteins localized to subcellular compartments that affect the properties of the timer. Moreover, we decided to exclude proteins unlikely to be expressed under standard yeast growth conditions. Using information from previous systematic protein tagging enterprises<sup>9-11</sup> and annotations collected in the *Saccharomyces* Genome Database (<http://www.yeastgenome.org>), we selected a total of 4081 ORFs (described in [section 1.3](#)).

Next, we proceeded to tag each ORF at the respective endogenous chromosomal locus with the mCherry-sfGFP timer. Strain manipulations were automated and performed in 96-well format whenever possible. Each ORF was assigned unique plate and well coordinates to facilitate the construction process. Following this coordinate system, ORF-specific primers required for tagging by PCR targeting (described in [section 1.4](#)) were obtained from IDT (Integrated DNA Technologies) in 96-well format. The module for seamless protein tagging with the mCherry-sfGFP timer was integrated into each selected genomic locus using conventional PCR targeting<sup>12</sup> and lithium acetate transformation of yeast<sup>13</sup>. The protocols were optimized for 96-well format such that up to 480 different strains could be constructed in parallel. Briefly, the tagging module was PCR amplified with ORF-specific primers containing short overhangs homologous to each genomic locus (described in [section 1.5](#)). Competent yMaM330 cells, prepared from a single colony, were transformed with each PCR product (described in [section 1.6](#)). Each transformation mixture (specific for a different ORF) was then manually plated onto a separate 9 cm plate with selective agar medium and incubated at 30°C until distinct colonies were visible. From each plate, six clones were manually purified for single colonies and four purified clones were subsequently inoculated into four separate 96-well plates according to the coordinates assigned to each ORF. Therefore, starting with 45 96-well plates of ORF-specific primers for PCR targeting, we obtained 45x4 plates of purified clones grown in liquid medium that were stored at -80°C at the end of the first round of transformations. Verification primers were obtained from IDT (Integrated DNA Technologies) in 96-well format using the same coordinate system (described in [section 1.7](#)) and used to test for correct integration of the tagging module into each locus by diagnostic PCR (described in [section 1.8](#)). For a subset of ORFs, the PCR gave unclear or ambiguous results and was therefore repeated using new validation primers (described in [section 1.7](#)). ORFs for which correct integration of the tagging module could not be confirmed for at least 2 clones were taken through a

second round of transformations using ORF-specific primers with longer overhangs homologous to each genomic locus (described in section 1.4). ORFs for which correct integration of the tagging module could not be confirmed for at least 2 clones after two rounds of transformation were taken through a third and final round of manual transformations. Finally, fluorescence intensities of all strains were measured with a fluorescence plate reader to identify clones validated by diagnostic PCR that nevertheless failed to express a tFT fusion due to mutations in the ORF-specific primers used for PCR targeting (described in section 1.9). In total, we obtained at least 2 validated clones for 3952 ORFs, 1 validated clone for 92 ORFs and no validated clones for 37 ORFs (Supplementary Table 2).

### 1.1. Tagging strategy

Studies in *S. cerevisiae* suggest that N-terminal residues of most proteins are likely to encode signals regulating protein turnover<sup>14,15</sup>. Although a variety of signals can also occur at the C-terminus of many proteins, in the absence of a systematic comparison between the effects of N- and C-terminal tagging, the tFT library was constructed using C-terminal tagging. We applied a seamless tagging approach that reduces the impact of introducing foreign sequences into the yeast genome and allows expression of protein fusions for their endogenous chromosomal loci under the control of both upstream and downstream gene regulatory elements<sup>16</sup>. We designed a module for seamless protein tagging with the mCherry-sfGFP timer that contains the following elements: S3 primer annealing site, *mCherry* sequence, I-SceI cut site, terminator sequence of the *CYC1* gene from *Saccharomyces paradoxus*, *URA3* gene with endogenous promoter and terminator from *S. cerevisiae*, second I-SceI cut site, *mCherry<sup>ΔN</sup>-sfGFP* sequence coding for a C-terminal fragment of mCherry followed by sfGFP, S2 primer annealing site (plasmid pMaM168 in Supplementary Table 5, Extended Data Fig. 3a). After integration of this module into a locus of interest using conventional PCR targeting, an mCherry-tagged protein is expressed. All auxiliary sequences required for clonal selection can then be excised from the genome through conditional expression of the I-SceI endonuclease, leading to the expression of an mCherry-sfGFP-tagged protein (Extended Data Fig. 3a). The seamless excision process is practically error free for the majority of yeast genes and thus does not require validation<sup>16</sup>.

### 1.2. Library background strain

The library background strain is based on the SGA entry strain Y8205<sup>8</sup>. The Y8205 strain (MAT $\alpha$  *can1Δ::STE2pr-SpHIS5 lyp1Δ::STE3pr-LEU2 his3Δ1 leu2Δ0 ura3Δ0*) can be crossed with strains of the opposite mating type carrying genome manipulations such as deletions of non-essential genes<sup>17</sup>, temperature-sensitive (*ts*) alleles<sup>18,19</sup> or decreased abundance by mRNA perturbation (DAmP) alleles<sup>20</sup> of essential genes. Importantly, this strain contains the genetic elements (*can1Δ::STE2pr-SpHIS5 lyp1Δ::STE3pr-LEU2*) necessary for selection of haploid double mutant progeny during the SGA procedure.

The seamless tagging strategy used to construct the tFT library relies on conditional expression of the I-SceI endonuclease<sup>16</sup> (Extended Data Fig. 3a). We constructed the plasmid pND32-8 carrying the *I-SCEI* sequence, placed under the control of the galactose-inducible promoter from the *GAL1* gene, and the nourseothricin resistance gene *natNT2*<sup>12</sup> (Supplementary Table 5). The *GAL1pr-I-SCEI-natNT2* sequence was then integrated into the *leu2Δ0* locus in the Y8205 strain by PCR targeting with primers ISce1-Nat-A (tcaaaaagatccatgtataatcttcattattacagccctcttgacttattcaggaaagttt cggaggag) and ISce1-Nat-B (gtttcgtctaccctatgaacatattccattttgtaattcgtgtcgcaagaattttcgttttaaacctaa g) and pND32-8 as template. Correct integration was verified by PCR. Tagging of all selected ORFs with the mCherry-sfGFP timer was performed in the resulting strain yMaM330 (Supplementary Table 4).

### 1.3. Selection of ORFs

We sought to reduce potential artifacts in the tFT library and to rationalize the labor required for library construction. Previously, most *S. cerevisiae* ORFs were successfully fused to a common tag at respective endogenous loci in a haploid reference strain<sup>9-11</sup>. The C-terminally tagged proteins

could be detected by fluorescence microscopy, flow cytometry or immunoblotting at levels close to endogenous<sup>9,10,21,22</sup>. However, some protein fusions could not be detected or analyzed because the C-terminus is important for protein function<sup>9,10</sup>. We sought to avoid tagging ORFs encoding such proteins. Moreover, the properties of the mCherry-sfGFP timer depend on the intracellular environment<sup>23</sup>. We sought to avoid tagging ORFs encoding proteins that localize to compartments with extreme environments such as the lumen of the vacuole or the cell wall/extracellular space.

Therefore, we selected all verified or uncharacterized ORFs from the *Saccharomyces* Genome Database assigned to the following gene ontology (GO) terms: GO:0005829 [cytosol], GO:0005634 [nucleus], GO:0005886 [plasma membrane], GO:0005737 [cytoplasm], GO:0016021 [integral to membrane] (as of 09/08/2010) and GO:0005739 [mitochondrion] (as of 07/09/2010). ORFs from the mitochondrial genome and the 2 $\mu$  plasmid were not included. For each protein localization pattern defined in a systematic localization study of GFP protein fusions in yeast<sup>9</sup>, ORFs absent from our list were manually inspected for possible inclusion. ORFs encoding the following proteins were subsequently removed from the selection:

- cell wall proteins (manually curated list of ORFs assigned to the GO terms GO:0005618 [cell wall] or GO:0009277 [fungal-type cell wall] as of December 2009);
- glycosylphosphatidylinositol (GPI)-anchored proteins<sup>24</sup>;
- tail-anchored proteins<sup>20,25</sup>;
- proteins with one of the following motifs at the C-terminus: HDEL, KKXX, CaaX ('X' stands for any amino acid, 'a' stands for an aliphatic amino acid) or the PTS1 peroxisomal targeting signal (selected using the Yeast Genome Pattern Matching tool at <http://www.yeastgenome.org/cgi-bin/PATMATCH/nph-patmatch> as of 30/08/2010);
- proteins fatty acylated at the C-terminus (manually curated list of proteins obtained from the UniProt Knowledgebase, <http://www.uniprot.org> as of 14/09/2010).

The resulting list was further curated using information from previous genome-wide tagging efforts<sup>9-11</sup> and a proteome-wide mass spectrometry study<sup>22</sup>. We decided to exclude ORFs encoding proteins that were tagged but could not be detected in any previous genome-wide tagging study<sup>9-11</sup>. ORFs encoding proteins that were not detected by mass spectrometry<sup>22</sup> and either were not detected by fluorescence microscopy after tagging with GFP<sup>9</sup> or no information on the expression of tagged proteins was available in any genome-wide library of protein fusions<sup>9-11</sup> were also excluded. This resulted in a list of 4081 ORFs ([Supplementary Table 2](#)).

#### 1.4. Primers for PCR targeting of the tagging module

S2/S3 primers for PCR amplification of the tagging module were designed as previously described<sup>13</sup>. Sequences of all ORFs with untranslated regions 1000 bases upstream of the initial ATG and 1000 bases downstream of the stop codon were downloaded from the *Saccharomyces* Genome Database ([orf\\_genomic\\_1000.fasta.gz](#) as of December 2009) and used for primer design. For each ORF, an S3 primer was composed of 55 nucleotides before the stop codon (excluding stop) followed by [cgtacgctgcaggtcgac](#) and an S2 primer was composed of the reverse complement of 55 nucleotides downstream of the stop codon (including stop) followed by [atcgatgaattcgagctcg](#). All primers were obtained from IDT (Integrated DNA Technologies) in 96-well format. Unique plate and well coordinates were assigned to each ORF such that each well contained a mixture of S2/S3 primers for a different ORF at 5  $\mu$ M concentration. A distinct well was left empty on each plate for identification purposes (plate 1 – well A1 empty, plate 2 – well A2 empty, etc.). Four wells on each plate were served as controls in PCR amplification of the tagging module: well H9 was left empty; well H10 contained a mixture of S2/S3 primers for *HSP104*, which performed robustly in PCR amplification of tagging modules (data not shown); well H11 contained a mixture of S2/S3 primers for *SPC110*, which yielded a PCR product only under optimal conditions (data not shown); well H12 was left empty.

New tagging primers were obtained for the ORFs for which no positive clones were identified by diagnostic PCR in the first round of transformations. For each ORF, the new S3 primer was composed of 62 nucleotides before the stop codon (excluding stop) followed by

cgtacgctgcaggtcgac and the new S2 primer was composed of the reverse complement of 61 nucleotides downstream of the stop codon (including stop) followed by atcgatgaattcgagctcg.

### 1.5. Amplification of the tagging module

The module for seamless protein tagging with mCherry-sfGFP was PCR amplified in 96-well format using the plasmid pMaM168 (Supplementary Table 5) as template and ORF-specific S2/S3 primers in each well, as follows. Cooled 96-well PCR plates (4titude, 4ti-0960) were filled with 45  $\mu$ l per well of a PCR mix (each well received 10  $\mu$ l of 5x Herculase II buffer (Agilent Technologies), 0.5  $\mu$ l of 100mM stock of dNTPs (Fermentas, R0141/0151/0161/0171), 0.075  $\mu$ l of 1M stock  $MgCl_2$ , 5  $\mu$ l of 5M stock of betaine (Sigma-Aldrich, 61962), 0.5  $\mu$ l of template DNA (200 ng/ $\mu$ l stock), 28.675  $\mu$ l of  $H_2O$  and 0.25  $\mu$ l of Herculase II Fusion DNA polymerase (Agilent Technologies, 600679)) using a Multiprobe II liquid handling 8-channel robot (Perkin Elmer). A mixture of ORF-specific S2/S3 primers (5  $\mu$ l of 5 $\mu$ M stock) was added to each well from 96-well primer source plates (see section 1.4) using the liquid handling 8-channel robot. The plates were sealed with peelable aluminum seals (Agilent, 24210-001) using a Velocity11 PlateLoc sealer. PCR was then carried out in PTC-225 PCR cyclers (MJ Research) using the following program: 2 min at 95°C, 30 cycles of 20 s at 95°C/20 s at 64°C/2 min 20 s at 72°C, 3 min at 72°C and incubation at 4°C. Control reactions in wells H8-H11 of each 96-well plate were examined by agarose gel electrophoresis to ensure successful amplification of the tagging module.

### 1.6. Transformation

Preparation of yeast competent cells and transformations were carried out essentially as previously described<sup>13</sup>. Briefly, a pre-culture of the strain yMaM330 was grown to saturation in rich YPD medium (1% yeast extract, 2% peptone, 2% glucose) and used to inoculate a 5 L YPD culture to optical density of 0.2 ( $OD_{600nm}$ ). After growth at 30°C to  $OD_{600nm}$  of 2.0, the cells were collected by centrifugation (500 g for 5 min at room temperature), washed first with 5 L of sterile water and finally with 1 L of LiSorb (100mM lithium acetate (L4158, Sigma), 1M sorbitol (1.07758.1000, Merck), 10mM Tris/HCl pH 8, 1mM EDTA/NaOH pH 8, adjusted to pH 8 with acetic acid). The cell pellet was resuspended in 45 ml of LiSorb, aliquoted and stored at -80°C. For transformations, a thawed aliquot of cells was mixed 18:2 with pre-boiled carrier DNA (salmon sperm DNA, #15632-011, Invitrogen).

Transformations were performed in 96-deepwell plates (Eppendorf, 0030 502.132). 50  $\mu$ l of competent yMaM330 cells were pipetted into each well. Using a Platetrak 96-channel liquid handling robot (Perkin Elmer), 5  $\mu$ l of amplified tagging module were transferred from each PCR plate (see section 1.5) into the corresponding transformation plate. 300  $\mu$ l of LiPEG (100mM lithium acetate (L4158, Sigma), 10mM Tris/HCl pH 8, 1mM EDTA/NaOH pH 8, 40% (w/v) polyethylene glycol (P4338, Sigma)) were subsequently added to each well and thoroughly mixed. The plates were sealed with gas permeable adhesive seals (AB-0718, Thermo Scientific) and incubated for 40 min in a 42°C water bath. After a centrifugation step (5 min at 500 g), the supernatant was removed and the cell pellet was resuspended in 100  $\mu$ l per well of synthetic medium devoid of uracil (SC-Ura) using the 96-channel liquid handling robot. The cell suspension from each well was manually plated onto a separate 9 cm plate with SC-Ura agar medium. The plates were incubated at 30°C for 3 days until clear colonies were visible in the control transformations (wells H10 and H11 in each 96-deepwell transformation plate).

Six clones from each 9 cm plate were manually streaked for single colonies on SC-Ura agar medium and incubated at 30°C for 2 days. For each ORF, four purified clones were inoculated in 96-well format (each well contained 150  $\mu$ l of SC-Ura medium with 15% (v/v) of glycerol), with each clone at the same well position in a separate 96-well plate. The plates were sealed with gas permeable adhesive seals, incubated at 30°C for 2 days and stored at -80°C.

### 1.7. Verification primers

ORF-specific verification primers that anneal within each ORF were designed using BatchPrimer3 v1.0<sup>26</sup> (<http://batchprimer3.bioinformatics.ucdavis.edu/index.html> as of 22/10/2010),

a high-throughput web implementation of Primer3<sup>27</sup>. For each ORF, a sequence composed of 1000 nucleotides before the STOP codon followed by the tag was entered into BatchPrimer3. Using the 1st set of constraints indicated below (min/optimal/max values are specified for each parameter), a unique primer with two consecutive G and/or C nucleotides at the 3' end that would yield a PCR product around 450 nucleotides long, when used together with a generic reverse primer (atggccatggtatcctcctcg) that anneals 71 nucleotides downstream of the start of the tag, was selected for each ORF. When no satisfactory primer could be found, the 2nd set of relaxed constraints or finally the 3rd set were used.

#### Selection of verification primers (first round)

|                                  | 1st set     | 2nd set     | 3rd set     |
|----------------------------------|-------------|-------------|-------------|
| PCR product length (nucleotides) | 300/450/600 | 300/450/600 | 300/450/670 |
| primer length (nucleotides)      | 19/20/21    | 18/20/22    | 18/20/24    |
| melting temperature (°C)         | 60/63/65    | 59/63/66    | 59/63/66    |
| GC content (%)                   | 25/50/75    | 25/50/75    | 25/50/75    |
| satisfactory primers             | 3911        | 158         | 12          |

These primers were used in the first round of diagnostic PCR. For 360 ORFs with ambiguous results, the diagnostic PCR was repeated with new ORF-specific primers, designed using the constraints indicated below (no optimal PCR product length in the 1st set, optimal PCR product length of 250 or 600 nucleotides in the 2nd and 3rd sets of constraints).

#### Selection of verification primers (second round)

|                                  | 1st set   | 2nd set    | 3rd set    |
|----------------------------------|-----------|------------|------------|
| PCR product length (nucleotides) | 300/0/600 | 250/<>/600 | 250/<>/600 |
| primer length (nucleotides)      | 19/20/21  | 18/20/22   | 18/20/24   |
| melting temperature (°C)         | 60/63/65  | 59/63/66   | 59/63/66   |
| GC content (%)                   | 25/50/75  | 25/50/75   | 25/50/75   |
| satisfactory primers             | 253       | 104        | 3          |

### 1.8. Diagnostic PCR

Integration of the tagging module into each genomic locus was tested by PCR. The junction between each ORF and the tag was verified using a forward ORF-specific primer annealing within the ORF and a generic reverse primer annealing within the tag (see section 1.7). Cooled 96-well PCR plates (4titude, 4ti-0960) were filled with 35 µl per well of a PCR mix (each well received 4 µl of 10x long incubation buffer (200mM Tris pH8.8, 100mM (NH<sub>4</sub>)<sub>2</sub>SO<sub>4</sub>, 100mM KCl), 0.16 µl of 100mM stock of dNTPs (Fermentas, R0141/0151/0161/0171), 0.1 µl of 1M stock MgCl<sub>2</sub>, 4 µl of 5M stock of betaine (Sigma-Aldrich, 61962), 0.2 µl of 100µM stock of the generic reverse primer (see section 1.7), 25.94 µl of H<sub>2</sub>O and 0.6 µl of Taq DNA polymerase (self-made, ~5 U/µl) using a Perkin Elmer Multiprobe II liquid handling 8-channel robot. A distinct forward ORF-specific validation primer (4 µl of 5µM stock) was added to each well from 96-well validation primer source plates (see section 1.7). A dense culture of each strain (stored at -80°C as glycerol stock, see section 1.6) added to each well (1 µl) provided the genomic DNA template. For each ORF-specific

primer, a control PCR was set up with the library background strain yMaM330 as a source of template DNA. The plates were sealed with peelable aluminum seal using a Velocity11 PlateLoc sealer. PCR was then carried out in MJ Research PTC-225 PCR cyclers using the following program: 7 min at 97°C, 38 cycles of 30 s at 95°C/30 s at 58°C/30 s at 72°C, 5 min at 72°C and incubation at 4°C.

All PCR products were examined by agarose gel electrophoresis using 96-well precast gels (2% E-Gel® 96 gels (G7008-02), Invitrogen) and a reference DNA ladder (FastRuler low range DNA ladder (SM1103), Fermentas). Clones with correct chromosomal integration of the tagging module were identified by the presence of a PCR product of expected size in the sample but not in the control PCR.

### **1.9. Whole colony imaging**

Using a RoToR pinning robot (Singer Instruments), all clones from a single 96-well transformation plate were combined in 1536-colony format with 4 technical replicates of each clone. All strains underwent seamless marker excision by sequential growth on galactose (synthetic complete medium containing 2% galactose and 2% raffinose instead of glucose) and 5-FOA plates (synthetic medium containing 5-fluoroorotic acid)<sup>16</sup>. Fluorescence intensities of all colonies were measured after ~21 h of growth on glucose medium (synthetic complete medium containing 2% glucose) using an Infinite M1000 Pro microplate reader (Tecan).



## 2. Supplementary Notes

### 2.1. Supplementary Note 1

We have previously shown that measurements of protein turnover with the mCherry-sfGFP timer exceed cycloheximide or pulse-chase experiments in both dynamic range and sensitivity. For instance, the turnover of 20 N-degrons differing in the N-terminal residue, which were previously classified into five stability groups based on pulse-chase experiments<sup>28,29</sup>, could be reliably resolved with the tFT, showing that each of the 20 N-degrons possesses a specific turnover (Supplementary Figure 7 in Ref.<sup>4</sup>).

Cycloheximide chase experiments are limited by the availability of free ubiquitin in the cell. Upon inhibition of translation, ubiquitin is depleted from yeast cell with a half-life of ~2 h<sup>30</sup>. This prevents reliable turnover measurements for relatively stable proteins. In contrast, the tFT approach is not limited by ubiquitin availability but by the maturation kinetics of the used fluorescent proteins. Degradation of proteins with half-lives between ~10 min and ~8 h can be analyzed with the mCherry-sfGFP timer<sup>4</sup>. Thus, although 3HA-tagged Are2, Yip4, Alg2 and Ybr287w appear rather stable in cycloheximide chase experiments (data not shown), tFT-tagged Are2, Yip4, Alg2 and Ybr287w were identified as Asi substrates in our screens (Fig. 3b) and, accordingly, accumulated at the nuclear rim in the *asi1*Δ mutant (Extended Data Fig. 4c).

Besides the aforementioned differences, we note that protein stability measurements with the tFT based on whole colony fluorescence measurements are not directly comparable with cycloheximide experiments also due to differences in growth conditions. Cycloheximide chase experiments are typically performed with exponentially growing cultures. However, measurements of colony fluorescence detect the signal mostly from the colony surface, where nutrient supply is limited and cells grow slower<sup>31</sup>, with a potential influence on protein expression and turnover. For instance, Aqy2 was identified as an Asi substrate in our screens (Fig. 3b) but was not expressed during exponential growth in synthetic complete medium (data not shown).

### 2.2. Supplementary Note 2

SILAC mass spectrometry<sup>32</sup> or quantitative microscopy can be used to identify potential substrates of degradation pathways based on changes in protein abundance<sup>33-35</sup>. However, these methods cannot distinguish between changes in abundance that result from altered protein stability and those caused by changes in protein expression. The tFT strategy directly identifies proteins with altered stability. However, in contrast to approaches based on mass spectrometry, it has the disadvantage that fusion to the tFT might compromise protein function<sup>36</sup>. Nevertheless, our screens identified Erg11 among the substrates of the Asi ubiquitin ligase, in agreement with the recent work of Foresti et al.<sup>37</sup> Nsg1, another Asi substrate identified by Foresti et al., is a false-negative in our screens, as retesting showed stabilization of Nsg1-tFT upon deletion of *AS11* (data not shown).

### 3. Supplementary Tables

#### **Supplementary Table 1: Correlation coefficients between genetic interaction profiles**

Pearson correlation coefficients between genetic interaction profiles of *ASI1*, *ASI2*, *ASI3*, *UBC6*, *UBC7*, *CUE1*, *HRD1*, *DOA10* genes and of all the other genes in the genome-wide genetic interaction map<sup>38</sup>. The data (Excel file) is available online.

#### **Supplementary Table 2: Strains in the tFT library**

Number of validated clones for each ORF in the tFT library, including ORFs with zero validated clones. The data (Excel file) is available online.

#### **Supplementary Table 3: Protein stability changes in screens with the tFT library**

Stability changes of each protein in the tFT library in *asi1* $\Delta$ , *asi3* $\Delta$ , *hrd1* $\Delta$ , *doa10* $\Delta$ , *ubc6* $\Delta$  and *ubc7* $\Delta$  mutants. z-scores and p-values adjusted for multiple testing are provided. The data (Excel file) is available online.

**Supplementary Table 4: Yeast strains used in this study**

| Strain   | Background | Genotype                                                                                                                                        | Source             |
|----------|------------|-------------------------------------------------------------------------------------------------------------------------------------------------|--------------------|
| PLY127   | S288c      | <i>MATa ura3-52 lys2Δ201</i>                                                                                                                    | Ljungdahl lab      |
| PLY966   | S288c      | <i>MATa ura3-52 lys2Δ201 leu2-3,112 ubc6Δ::LEU2</i>                                                                                             | Ref. <sup>39</sup> |
| PLY967   | S288c      | <i>MATa ura3-52 lys2Δ201 leu2-3,112 ubc7Δ::LEU2</i>                                                                                             | Ref. <sup>39</sup> |
| PLY1558  | S288c      | <i>MATa ura3-52 lys2Δ201 leu2-3,112 ubc6Δ::LEU2 ubc7Δ::natMX4</i>                                                                               | Ref. <sup>39</sup> |
| PLY1327  | S288c      | <i>MATa ura3-52 lys2Δ201 asi1Δ80::hphMX</i>                                                                                                     | Ljungdahl lab      |
| PLY1329  | S288c      | <i>MATa ura3-52 lys2Δ201 asi3Δ::kanMX</i>                                                                                                       | Ljungdahl lab      |
| BY4741   | S288c      | <i>MATa his3Δ1 leu2Δ0 met15Δ0 ura3Δ0</i>                                                                                                        | Ref. <sup>40</sup> |
| MHY2241  | BY4741     | <i>ubc4Δ::kanMX</i>                                                                                                                             | Hochstrasser lab   |
| MHY3032  | BY4741     | <i>hrd1Δ::kanMX</i>                                                                                                                             | Ref. <sup>41</sup> |
| MHY3033  | BY4741     | <i>doa10Δ::kanMX</i>                                                                                                                            | Ref. <sup>41</sup> |
| Y8205    | S288c      | <i>MATalpha his3Δ1 leu2Δ0 met15Δ0 ura3Δ0</i>                                                                                                    | Ref. <sup>40</sup> |
| scEB115  | Y8205      | <i>can1Δ::STE2pr-spHIS5 lyp1Δ::STE3pr-LEU2</i><br><i>MATalpha can1Δ::STE2pr-spHIS5 lyp1Δ::STE3pr-HPH</i><br><i>rpn7Δ::RPN7-tDimer2(12)-LEU2</i> | Rabut lab          |
| scEB133  | scEB115    | <i>ubc1Δ::VC-UBC1-natMX</i>                                                                                                                     | Rabut lab          |
| scEB129  | scEB115    | <i>rad6Δ::RAD6-VC-natMX</i>                                                                                                                     | Rabut lab          |
| scEB130  | scEB115    | <i>cdc34Δ::CDC34-VC-natMX</i>                                                                                                                   | Rabut lab          |
| scEB153  | scEB115    | <i>ubc4Δ::UBC4-VC-natMX</i>                                                                                                                     | Rabut lab          |
| scEB121  | scEB115    | <i>ubc5Δ::UBC5-VC-natMX</i>                                                                                                                     | Rabut lab          |
| scEB152  | scEB115    | <i>ubc6Δ::VC-UBC6-natMX</i>                                                                                                                     | Rabut lab          |
| scGR1267 | scEB115    | <i>ubc7Δ::VC-UBC7-natMX</i>                                                                                                                     | Rabut lab          |
| scEB125  | scEB115    | <i>ubc8Δ::UBC8-VC-natMX</i>                                                                                                                     | Rabut lab          |
| scEB126  | scEB115    | <i>pex4Δ::PEX4-VC-natMX</i>                                                                                                                     | Rabut lab          |
| scEB127  | scEB115    | <i>ubc11Δ::UBC11-VC-natMX</i>                                                                                                                   | Rabut lab          |
| scEB123  | scEB115    | <i>ubc13Δ::UBC13-VC-natMX</i>                                                                                                                   | Rabut lab          |
| VN_0484  | BY4741     | <i>hul4Δ::HUL4-VN-KIURA3</i>                                                                                                                    | Bioneer            |
| VN_0394  | BY4741     | <i>hul5Δ::HUL5-VN-KIURA3</i>                                                                                                                    | Bioneer            |
| scGR1173 | BY4741     | <i>pGR703 (expressing RSP5-VN)</i>                                                                                                              | Rabut lab          |
| VN_0034  | BY4741     | <i>tom1Δ::TOM1-VN-KIURA3</i>                                                                                                                    | Bioneer            |
| VN_0045  | BY4741     | <i>ufd4Δ::UFD4-VN-KIURA3</i>                                                                                                                    | Bioneer            |
| VN_1027  | BY4741     | <i>asi1Δ::ASI1-VN-KIURA3</i>                                                                                                                    | Bioneer            |
| VN_0927  | BY4741     | <i>asi3Δ::ASI3-VN-KIURA3</i>                                                                                                                    | Bioneer            |
| VN_2780  | BY4741     | <i>asr1Δ::ASR1-VN-KIURA3</i>                                                                                                                    | Bioneer            |
| VN_0860  | BY4741     | <i>bre1Δ::BRE1-VN-KIURA3</i>                                                                                                                    | Bioneer            |
| VN_3152  | BY4741     | <i>cwc24Δ::CWC24-VN-KIURA3</i>                                                                                                                  | Bioneer            |
| VN_2108  | BY4741     | <i>dma1Δ::DMA1-VN-KIURA3</i>                                                                                                                    | Bioneer            |
| VN_1460  | BY4741     | <i>dma2Δ::DMA2-VN-KIURA3</i>                                                                                                                    | Bioneer            |
| VN_4936  | BY4741     | <i>doa10Δ::DOA10-VN-KIURA3</i>                                                                                                                  | Bioneer            |
| VN_1175  | BY4741     | <i>etp1Δ::ETP1-VN-KIURA3</i>                                                                                                                    | Bioneer            |
| VN_0376  | BY4741     | <i>fap1Δ::FAP1-VN-KIURA3</i>                                                                                                                    | Bioneer            |
| scGR1165 | BY4741     | <i>far1Δ::VN-FAR1-URA3</i>                                                                                                                      | Rabut lab          |
| VN_1990  | BY4741     | <i>gid2Δ::GID2-VN-KIURA3</i>                                                                                                                    | Bioneer            |
| VN_1419  | BY4741     | <i>gid9Δ::GID9-VN-KIURA3</i>                                                                                                                    | Bioneer            |
| VN_1031  | BY4741     | <i>hel2Δ::HEL2-VN-KIURA3</i>                                                                                                                    | Bioneer            |
| VN_5317  | BY4741     | <i>hrd1Δ::HRD1-VN-KIURA3</i>                                                                                                                    | Bioneer            |
| VN_0043  | BY4741     | <i>irc20Δ::IRC20-VN-KIURA3</i>                                                                                                                  | Bioneer            |
| VN_0884  | BY4741     | <i>mag2Δ::MAG2-VN-KIURA3</i>                                                                                                                    | Bioneer            |
| scGR1166 | BY4741     | <i>mot2Δ::VN-MOT2-URA3</i>                                                                                                                      | Rabut lab          |
| VN_0246  | BY4741     | <i>mtc5Δ::MTC5-VN-KIURA3</i>                                                                                                                    | Bioneer            |
| scGR1172 | BY4741     | <i>nam7Δ::VN-NAM7-URA3</i>                                                                                                                      | Rabut lab          |
| VN_5066  | BY4741     | <i>pep3Δ::PEP3-VN-KIURA3</i>                                                                                                                    | Bioneer            |
| VN_5052  | BY4741     | <i>pep5Δ::PEP5-VN-KIURA3</i>                                                                                                                    | Bioneer            |
| VN_5657  | BY4741     | <i>pex2Δ::PEX2-VN-KIURA3</i>                                                                                                                    | Bioneer            |
| VN_5559  | BY4741     | <i>pex10Δ::PEX10-VN-KIURA3</i>                                                                                                                  | Bioneer            |
| VN_5469  | BY4741     | <i>pex12Δ::PEX12-VN-KIURA3</i>                                                                                                                  | Bioneer            |
| VN_2059  | BY4741     | <i>psh1Δ::VN-PSH1-KIURA3</i>                                                                                                                    | Bioneer            |
| VN_0234  | BY4741     | <i>rad5Δ::RAD5-VN-KIURA3</i>                                                                                                                    | Bioneer            |
| VN_0644  | BY4741     | <i>rad16Δ::RAD16-VN-KIURA3</i>                                                                                                                  | Bioneer            |
| VN_1639  | BY4741     | <i>rad18Δ::RAD18-VN-KIURA3</i>                                                                                                                  | Bioneer            |
| VN_0021  | BY4741     | <i>rkr1Δ::RKR1-VN-KIURA3</i>                                                                                                                    | Bioneer            |
| VN_0153  | BY4741     | <i>rtc1Δ::RTC1-VN-KIURA3</i>                                                                                                                    | Bioneer            |
| VN_1107  | BY4741     | <i>san1Δ::SAN1-VN-KIURA3</i>                                                                                                                    | Bioneer            |
| VN_1072  | BY4741     | <i>slx5Δ::SLX5-VN-KIURA3</i>                                                                                                                    | Bioneer            |
| VN_3137  | BY4741     | <i>slx8Δ::SLX8-VN-KIURA3</i>                                                                                                                    | Bioneer            |
| scGR1171 | BY4741     | <i>ste5Δ::VN-STE5-URA3</i>                                                                                                                      | Rabut lab          |
| VN_1785  | BY4741     | <i>ssl1Δ::SSL1-VN-KIURA3</i>                                                                                                                    | Bioneer            |
| scGR1167 | BY4741     | <i>tfb3Δ::VN-TFB3-URA3</i>                                                                                                                      | Rabut lab          |
| VN_0629  | BY4741     | <i>tul1Δ::TUL1-VN-KIURA3</i>                                                                                                                    | Bioneer            |
| VN_0060  | BY4741     | <i>ubr2Δ::UBR2-VN-KIURA3</i>                                                                                                                    | Bioneer            |
| VN_0020  | BY4741     | <i>uls1Δ::ULS1-VN-KIURA3</i>                                                                                                                    | Bioneer            |
| VN_4927  | BY4741     | <i>vps8Δ::VPS8-VN-KIURA3</i>                                                                                                                    | Bioneer            |
| VN_4447  | BY4741     | <i>ybr062cΔ::YBR062C-VN-KIURA3</i>                                                                                                              | Bioneer            |
| scGR1168 | BY4741     | <i>prp19Δ::VN-PRP19-URA3</i>                                                                                                                    | Rabut lab          |

| Strain   | Background | Genotype                                                                               | Source          |
|----------|------------|----------------------------------------------------------------------------------------|-----------------|
| VN_0419  | BY4741     | <i>ufd2Δ::UFD2-VN-KIURA3</i>                                                           | Bioneer         |
| VN_1367  | BY4741     | <i>hel1Δ::HEL1-VN-KIURA3</i>                                                           | Bioneer         |
| VN_1749  | BY4741     | <i>itt1Δ::ITT1-VN-KIURA3</i>                                                           | Bioneer         |
| VN_3891  | BY4741     | <i>apc11Δ::APC11-VN-KIURA3</i>                                                         | Bioneer         |
| VN_0690  | BY4741     | <i>cul3Δ::CUL3-VN-KIURA3</i>                                                           | Bioneer         |
| VN_0556  | BY4741     | <i>rtt101Δ::RTT101-VN-KIURA3</i>                                                       | Bioneer         |
| scEB300  | scEB115    | <i>asi1Δ::ASI1-VN-KIURA3 ubc6Δ::VC-UBC6-natMX</i>                                      | Rabut lab       |
| scEB289  | scEB115    | <i>asi1Δ::ASI1-VN-KIURA3 ubc4Δ::UBC4-VC-natMX</i>                                      | Rabut lab       |
| scEB323  | scEB115    | <i>asi1Δ::ASI1-VN-KIURA3 ubc4Δ::UBC4-VC-natMX ubc6Δ::kanMX</i>                         | Rabut lab       |
| scEB258  | scEB115    | <i>asi3Δ::ASI3-VN-KIURA3 ubc6Δ::VC-UBC6-natMX</i>                                      | Rabut lab       |
| scEB265  | scEB115    | <i>asi3Δ::ASI3-VN-KIURA3 ubc6Δ::VC-UBC6-natMX asi1Δ::kanMX</i>                         | Rabut lab       |
| scEB266  | scEB115    | <i>asi3Δ::ASI3-VN-KIURA3 ubc6Δ::VC-UBC6-natMX asi2Δ::kanMX</i>                         | Rabut lab       |
| scGR1245 | BY4741     | <i>asi3Δ::ASI3-TAP-HIS3MX</i>                                                          | Open Biosystems |
| scGR1258 | BY4741     | <i>asi3Δ::ASI3-TAP-HIS3MX asi1Δ::kanMX</i>                                             | Rabut lab       |
| scGR1260 | BY4741     | <i>asi3Δ::ASI3-TAP-HIS3MX asi2Δ::kanMX</i>                                             | Rabut lab       |
| scAB17   | W303       | <i>tor1-1 fpr1::NAT RPL13A-2xFKBP12::TRP1 PRE8-FRBGFP::kanMX6 stp2(1-45)-TAP::URA3</i> | Rabut lab       |
| scAB22   | scAB17     | <i>asi3::HPH</i>                                                                       | Rabut lab       |
| scAB23   | scAB17     | <i>ubc6::HPH</i>                                                                       | Rabut lab       |
| scAB24   | scAB17     | <i>ubc7::HPH</i>                                                                       | Rabut lab       |
| AK1234   | BY4741     | <i>asi1Δ::kanMX6</i>                                                                   | Knop lab        |
| YMaM767  | BY4741     | <i>ire1Δ::natNT2 hrd1Δ::hphNT1</i>                                                     | Knop lab        |
| YMaM768  | BY4741     | <i>hac1Δ::natNT2 hrd1Δ::hphNT1</i>                                                     | Knop lab        |
| YMaM814  | BY4741     | <i>ire1Δ::natNT2 hrd1Δ::hphNT1 asi1Δ::kanMX6</i>                                       | Knop lab        |
| YMaM815  | BY4741     | <i>hac1Δ::natNT2 hrd1Δ::hphNT1 asi1Δ::kanMX6</i>                                       | Knop lab        |
| AK1222   | BY4741     | <i>hrd1Δ::hphNT1</i>                                                                   | Knop lab        |
| AK1225   | BY4741     | <i>doa10Δ::hphNT1</i>                                                                  | Knop lab        |
| YMaM891  | BY4741     | <i>hrd1Δ::hphNT1 asi1Δ::kanMX6</i>                                                     | Knop lab        |
| YMaM892  | BY4741     | <i>doa10Δ::hphNT1 asi1Δ::kanMX6</i>                                                    | Knop lab        |
| YMaM330  | Y8205      | <i>leu2Δ::GAL1pr-I-SCEI-natNT2</i>                                                     | Knop lab        |
| YMaM344  | YMaM330    | <i>ura3Δ0::mCherryΔN-I-Scelsite-CYC1term-ScURA3-I-Scelsite-mCherryΔN</i>               | Knop lab        |
| AK1235   | BY4741     | <i>asi2Δ::kanMX6</i>                                                                   | Knop lab        |
| AK1236   | BY4741     | <i>asi3Δ::kanMX6</i>                                                                   | Knop lab        |
| AK1237   | BY4741     | <i>ubc6Δ::kanMX6</i>                                                                   | Knop lab        |
| AK1238   | BY4741     | <i>ubc7Δ::kanMX6</i>                                                                   | Knop lab        |
| AK1239   | BY4741     | <i>cue1Δ::kanMX6</i>                                                                   | Knop lab        |
| YMaM758  | YMaM330    | <i>VTC1-mCherry-sfGFP</i>                                                              | Knop lab        |
| YMaM757  | YMaM330    | <i>ERG11-mCherry-sfGFP</i>                                                             | Knop lab        |
| YMaM759  | YMaM330    | <i>VCX1-mCherry-sfGFP</i>                                                              | Knop lab        |
| YMaM762  | YMaM330    | <i>ARE2-mCherry-sfGFP</i>                                                              | Knop lab        |
| YMaM765  | YMaM330    | <i>YIP4-mCherry-sfGFP</i>                                                              | Knop lab        |
| YMaM756  | YMaM330    | <i>ALG2-mCherry-sfGFP</i>                                                              | Knop lab        |
| YMaM764  | YMaM330    | <i>VTC4-mCherry-sfGFP</i>                                                              | Knop lab        |
| YMaM761  | YMaM330    | <i>YBR287W-mCherry-sfGFP</i>                                                           | Knop lab        |
| YMaM763  | YMaM330    | <i>AQY2-mCherry-sfGFP</i>                                                              | Knop lab        |
| YMaM760  | YMaM330    | <i>ERG1-mCherry-sfGFP</i>                                                              | Knop lab        |
| YMaM828  | YMaM330    | <i>VTC1-mCherry-sfGFP asi1Δ::hphNT1</i>                                                | Knop lab        |
| YMaM827  | YMaM330    | <i>ERG11-mCherry-sfGFP asi1Δ::hphNT1</i>                                               | Knop lab        |
| YMaM830  | YMaM330    | <i>VCX1-mCherry-sfGFP asi1Δ::hphNT1</i>                                                | Knop lab        |
| YMaM831  | YMaM330    | <i>ARE2-mCherry-sfGFP asi1Δ::hphNT1</i>                                                | Knop lab        |
| YMaM833  | YMaM330    | <i>YIP4-mCherry-sfGFP asi1Δ::hphNT1</i>                                                | Knop lab        |
| YMaM829  | YMaM330    | <i>ALG2-mCherry-sfGFP asi1Δ::hphNT1</i>                                                | Knop lab        |
| YMaM832  | YMaM330    | <i>VTC4-mCherry-sfGFP asi1Δ::hphNT1</i>                                                | Knop lab        |
| YMaM835  | YMaM330    | <i>YBR287W-mCherry-sfGFP asi1Δ::hphNT1</i>                                             | Knop lab        |
| YMaM834  | YMaM330    | <i>AQY2-mCherry-sfGFP asi1Δ::hphNT1</i>                                                | Knop lab        |
| YMaM836  | YMaM330    | <i>ERG1-mCherry-sfGFP asi1Δ::hphNT1</i>                                                | Knop lab        |
| YMaM818  | YMaM330    | <i>VTC1-mCherry-sfGFP hrd1Δ::hphNT1</i>                                                | Knop lab        |
| YMaM817  | YMaM330    | <i>ERG11-mCherry-sfGFP hrd1Δ::hphNT1</i>                                               | Knop lab        |
| YMaM820  | YMaM330    | <i>VCX1-mCherry-sfGFP hrd1Δ::hphNT1</i>                                                | Knop lab        |
| YMaM821  | YMaM330    | <i>ARE2-mCherry-sfGFP hrd1Δ::hphNT1</i>                                                | Knop lab        |
| YMaM823  | YMaM330    | <i>YIP4-mCherry-sfGFP hrd1Δ::hphNT1</i>                                                | Knop lab        |
| YMaM819  | YMaM330    | <i>ALG2-mCherry-sfGFP hrd1Δ::hphNT1</i>                                                | Knop lab        |
| YMaM822  | YMaM330    | <i>VTC4-mCherry-sfGFP hrd1Δ::hphNT1</i>                                                | Knop lab        |
| YMaM825  | YMaM330    | <i>YBR287W-mCherry-sfGFP hrd1Δ::hphNT1</i>                                             | Knop lab        |
| YMaM824  | YMaM330    | <i>AQY2-mCherry-sfGFP hrd1Δ::hphNT1</i>                                                | Knop lab        |
| YMaM826  | YMaM330    | <i>ERG1-mCherry-sfGFP hrd1Δ::hphNT1</i>                                                | Knop lab        |
| YMaM791  | BY4741     | <i>VTC1-3HA-hphNT1</i>                                                                 | Knop lab        |
| YMaM790  | BY4741     | <i>ERG11-3HA-hphNT1</i>                                                                | Knop lab        |
| YMaM793  | BY4741     | <i>VCX1-3HA-hphNT1</i>                                                                 | Knop lab        |
| YMaM795  | BY4741     | <i>VTC4-3HA-hphNT1</i>                                                                 | Knop lab        |
| YMaM801  | BY4741     | <i>VTC1-3HA-hphNT1 asi1Δ::kanMX6</i>                                                   | Knop lab        |
| YMaM800  | BY4741     | <i>ERG11-3HA-hphNT1 asi1Δ::kanMX6</i>                                                  | Knop lab        |
| YMaM803  | BY4741     | <i>VCX1-3HA-hphNT1 asi1Δ::kanMX6</i>                                                   | Knop lab        |
| YMaM805  | BY4741     | <i>VTC4-3HA-hphNT1 asi1Δ::kanMX6</i>                                                   | Knop lab        |
| YMaM864  | BY4741     | <i>VTC1-3HA-hphNT1 hrd1Δ::natNT2</i>                                                   | Knop lab        |

| Strain  | Background | Genotype                                                                   | Source   |
|---------|------------|----------------------------------------------------------------------------|----------|
| YMaM863 | BY4741     | <i>ERG11-3HA-hphNT1 hrd1Δ::natNT2</i>                                      | Knop lab |
| YMaM866 | BY4741     | <i>VCX1-3HA-hphNT1 hrd1Δ::natNT2</i>                                       | Knop lab |
| YMaM868 | BY4741     | <i>VTC4-3HA-hphNT1 hrd1Δ::natNT2</i>                                       | Knop lab |
| YDK179  | BY4741     | <i>VTC1-3HA-hphNT1 asi1Δ::kanMX6 hrd1Δ::natNT2 doa10Δ::KIURA3</i>          | Knop lab |
| YDK178  | BY4741     | <i>ERG11-3HA-hphNT1 asi1Δ::kanMX6 hrd1Δ::natNT2 doa10Δ::KIURA3</i>         | Knop lab |
| YDK180  | BY4741     | <i>VCX1-3HA-hphNT1 asi1Δ::kanMX6 hrd1Δ::natNT2 doa10Δ::KIURA3</i>          | Knop lab |
| YDK181  | BY4741     | <i>VTC4-3HA-hphNT1 asi1Δ::kanMX6 hrd1Δ::natNT2 doa10Δ::KIURA3</i>          | Knop lab |
| YDK182  | BY4741     | <i>VTC1-myeGFP-kanMX</i>                                                   | Knop lab |
| YDK188  | BY4741     | <i>VTC4-myeGFP-kanMX</i>                                                   | Knop lab |
| YDK223  | YMaM330    | <i>sfGFPΔC-I-Scelsite-SpCYC1term-ScURA3-SpTEF1pr-I-Scelsite-sfGFP-VTC1</i> | Knop lab |
| YDK224  | YMaM330    | <i>sfGFPΔC-I-Scelsite-SpCYC1term-ScURA3-SpTEF1pr-I-Scelsite-sfGFP-VTC4</i> | Knop lab |
| YDK266  | YMaM330    | <i>sfGFP-VTC1</i>                                                          | Knop lab |
| YDK267  | YMaM330    | <i>sfGFP-VTC4</i>                                                          | Knop lab |

### Supplementary Table 5: Plasmids used in this study

| Plasmid        | Description                                                           | Source             |
|----------------|-----------------------------------------------------------------------|--------------------|
| pRS316         | CEN ARS URA4 low copy yeast/ <i>E. coli</i> shuttle plasmid           | Ref. <sup>42</sup> |
| pRS317         | CEN ARS LYS2 low copy yeast/ <i>E. coli</i> shuttle plasmid           | Ref. <sup>42</sup> |
| pCA047         | pRS316 ( <i>URA3</i> ) containing <i>STP1-3HA</i>                     | Ref. <sup>43</sup> |
| pCA111         | pRS316 ( <i>URA3</i> ) containing <i>STP2-3HA</i>                     | Ref. <sup>43</sup> |
| pDO74          | pRS316 ( <i>URA3</i> ) containing <i>STP1-RI<sub>17-33</sub>-3HA</i>  | Ref. <sup>44</sup> |
| pAG04          | pRS316 ( <i>URA3</i> ) containing <i>STP2Δ<sub>2-13</sub>-3HA</i>     | Ljungdahl lab      |
| YCpAGP1-LacZ   | AGP1pr-lacZ in CEN URA3                                               | Ref. <sup>45</sup> |
| pFA6a          | <i>E. coli</i> plasmid containing the ampicillin resistance gene ampR | Ref. <sup>46</sup> |
| pFA6a-KanMX6   | pFA6a-KanMX6                                                          | Ref. <sup>46</sup> |
| pKS133         | pFA6a-HphNT1                                                          | Ref. <sup>12</sup> |
| pKS134         | pFA6a-NatNT2                                                          | Ref. <sup>12</sup> |
| pYM24          | pFA6a-3HA-HphNT1                                                      | Ref. <sup>12</sup> |
| pMaM168        | pFA6a-mCherry-I-Scelsite-SpCYC1term-ScURA3-I-Scelsite-mCherryΔN-sfGFP | Knop lab           |
| pND32-8        | pRS305N-GAL1pr-I-SCEI                                                 | Ref. <sup>16</sup> |
| pMaM173        | pFA6a-sfGFPΔC-I-Scelsite-SpCYC1term-ScURA3-SpTEF1pr-I-Scelsite-sfGFP  | Knop lab           |
| pYM12monomeric | pFA6a-yeGFP-kanMX6 with A206R mutation                                | Knop lab           |
| pGR731         | pGEX4TG containing GST-Ubc6 <sup>ΔTM</sup>                            | Rabut lab          |
| pGR732         | pGEX4TG containing GST-Ubc7                                           | Rabut lab          |
| pGR738         | pETDuet-1 containing GST-Ubc7 + Cue1 <sup>U7BR</sup>                  | Rabut lab          |
| pGR773         | pMALXTG containing MBP-Hrd1 <sup>CT</sup>                             | Rabut lab          |
| pGR759         | pMALXTG containing MBP-Asi1 <sup>RING</sup>                           | Rabut lab          |
| pGR766         | pMALXTG containing MBP-Asi3 <sup>RING</sup>                           | Rabut lab          |
| pGR703         | pRS316 ( <i>URA3</i> ) containing Rsp5-VN                             | Rabut lab          |
| pGR295         | p415TEF1 ( <i>LEU2</i> ) containing 10His-Ubiquitin                   | Rabut lab          |

## 4. References

1. Belle, A., Tanay, A., Bitincka, L., Shamir, R. & O'Shea, E. K. Quantification of protein half-lives in the budding yeast proteome. *Proc. Natl. Acad. Sci. U.S.A.* **103**, 13004–13009 (2006).
2. Shaner, N. C. *et al.* Improved monomeric red, orange and yellow fluorescent proteins derived from *Discosoma* sp. red fluorescent protein. *Nat. Biotechnol.* **22**, 1567–1572 (2004).
3. Pédelacq, J.-D., Cabantous, S., Tran, T., Terwilliger, T. C. & Waldo, G. S. Engineering and characterization of a superfolder green fluorescent protein. *Nat. Biotechnol.* **24**, 79–88 (2006).
4. Khmelinskii, A. *et al.* Tandem fluorescent protein timers for in vivo analysis of protein dynamics. *Nat. Biotechnol.* **30**, 708–714 (2012).
5. Giaever, G. & Nislow, C. The yeast deletion collection: a decade of functional genomics. *Genetics* **197**, 451–465 (2014).
6. Botstein, D. & Fink, G. R. Yeast: an experimental organism for 21st Century biology. *Genetics* **189**, 695–704 (2011).
7. Tong, A. H. *et al.* Systematic genetic analysis with ordered arrays of yeast deletion mutants. *Science* **294**, 2364–2368 (2001).
8. Tong, A. H. Y. & Boone, C. Synthetic genetic array analysis in *Saccharomyces cerevisiae*. *Methods Mol. Biol.* **313**, 171–192 (2006).
9. Huh, W.-K. *et al.* Global analysis of protein localization in budding yeast. *Nature* **425**, 686–691 (2003).
10. Ghaemmaghami, S. *et al.* Global analysis of protein expression in yeast. *Nature* **425**, 737–741 (2003).
11. Gavin, A.-C. *et al.* Proteome survey reveals modularity of the yeast cell machinery. *Nature* **440**, 631–636 (2006).
12. Janke, C. *et al.* A versatile toolbox for PCR-based tagging of yeast genes: new fluorescent proteins, more markers and promoter substitution cassettes. *Yeast* **21**, 947–962 (2004).
13. Knop, M. *et al.* Epitope tagging of yeast genes using a PCR-based strategy: more tags and improved practical routines. *Yeast* **15**, 963–972 (1999).
14. Hwang, C.-S., Shemorry, A. & Varshavsky, A. N-terminal acetylation of cellular proteins creates specific degradation signals. *Science* **327**, 973–977 (2010).
15. Kim, H.-K. *et al.* The N-terminal methionine of cellular proteins as a degradation signal. *Cell* **156**, 158–169 (2014).
16. Khmelinskii, A., Meurer, M., Duishoev, N., Delhomme, N. & Knop, M. Seamless gene tagging by endonuclease-driven homologous recombination. *PLoS ONE* **6**, e23794 (2011).
17. Winzeler, E. A. *et al.* Functional characterization of the *S. cerevisiae* genome by gene deletion and parallel analysis. *Science* **285**, 901–906 (1999).
18. Ben-Aroya, S. *et al.* Toward a comprehensive temperature-sensitive mutant repository of the essential genes of *Saccharomyces cerevisiae*. *Mol. Cell* **30**, 248–258 (2008).
19. Li, Z. *et al.* Systematic exploration of essential yeast gene function with temperature-sensitive mutants. *Nat. Biotechnol.* **29**, 361–367 (2011).
20. Schuldiner, M. *et al.* Exploration of the function and organization of the yeast early secretory pathway through an epistatic miniarray profile. *Cell* **123**, 507–519 (2005).
21. Newman, J. R. S. *et al.* Single-cell proteomic analysis of *S. cerevisiae* reveals the architecture of biological noise. *Nature* **441**, 840–846 (2006).
22. de Godoy, L. M. F. *et al.* Comprehensive mass-spectrometry-based proteome quantification of haploid versus diploid yeast. *Nature* **455**, 1251–1254 (2008).
23. Khmelinskii, A. & Knop, M. Analysis of protein dynamics with tandem fluorescent protein timers. *Methods Mol. Biol.* **1174**, 195–210 (2014).
24. De Groot, P. W. J., Hellingwerf, K. J. & Klis, F. M. Genome-wide identification of fungal GPI proteins. *Yeast* **20**, 781–796 (2003).
25. Beilharz, T., Egan, B., Silver, P. A., Hofmann, K. & Lithgow, T. Bipartite signals mediate subcellular targeting of tail-anchored membrane proteins in *Saccharomyces cerevisiae*. *J.*

- Biol. Chem.* **278**, 8219–8223 (2003).
26. You, F. M. *et al.* BatchPrimer3: a high throughput web application for PCR and sequencing primer design. *BMC Bioinformatics* **9**, 253 (2008).
  27. Rozen, S. & Skaletsky, H. Primer3 on the WWW for general users and for biologist programmers. *Methods Mol. Biol.* **132**, 365–386 (2000).
  28. Bachmair, A., Finley, D. & Varshavsky, A. In vivo half-life of a protein is a function of its amino-terminal residue. *Science* **234**, 179–186 (1986).
  29. Bachmair, A. & Varshavsky, A. The degradation signal in a short-lived protein. *Cell* **56**, 1019–1032 (1989).
  30. Hanna, J., Leggett, D. S. & Finley, D. Ubiquitin depletion as a key mediator of toxicity by translational inhibitors. *Mol. Cell. Biol.* **23**, 9251–9261 (2003).
  31. Vulin, C. *et al.* Growing yeast into cylindrical colonies. *Biophys. J.* **106**, 2214–2221 (2014).
  32. Ong, S.-E. *et al.* Stable isotope labeling by amino acids in cell culture, SILAC, as a simple and accurate approach to expression proteomics. *Mol. Cell Proteomics* **1**, 376–386 (2002).
  33. Hemming, M. L., Elias, J. E., Gygi, S. P. & Selkoe, D. J. Proteomic profiling of gamma-secretase substrates and mapping of substrate requirements. *PLoS Biol.* **6**, e257 (2008).
  34. Benanti, J. A., Cheung, S. K., Brady, M. C. & Toczyski, D. P. A proteomic screen reveals SCFGrr1 targets that regulate the glycolytic-gluconeogenic switch. *Nat. Cell Biol.* **9**, 1184–1191 (2007).
  35. Foresti, O., Ruggiano, A., Hannibal-Bach, H. K., Ejsing, C. S. & Carvalho, P. Sterol homeostasis requires regulated degradation of squalene monooxygenase by the ubiquitin ligase Doa10/Teb4. *Elife* **2**, e00953 (2013).
  36. Yewdell, J. W., Lacsina, J. R., Rechsteiner, M. C. & Nicchitta, C. V. Out with the old, in with the new? Comparing methods for measuring protein degradation. *Cell Biol. Int.* **35**, 457–462 (2011).
  37. Foresti, O., Rodriguez-Vaello, V., Funaya, C. & Carvalho, P. Quality control of inner nuclear membrane proteins by the Asi complex. *Science* **346**, 751–755 (2014).
  38. Costanzo, M. *et al.* The Genetic Landscape of a Cell. *Science* **327**, 425–431 (2010).
  39. Kota, J., Gilstring, C. F. & Ljungdahl, P. O. Membrane chaperone Shr3 assists in folding amino acid permeases preventing precocious ERAD. *J. Cell Biol.* **176**, 617–628 (2007).
  40. Tong, A. H. Y. & Boone, C. High-Throughput Strain Construction and Systematic Synthetic Lethal Screening in *Saccharomyces cerevisiae*. *Meth. Microbiol.* **36**, 369–386 (2007).
  41. Zattas, D., Adle, D. J., Rubenstein, E. M. & Hochstrasser, M. N-terminal acetylation of the yeast Derlin Der1 is essential for Hrd1 ubiquitin-ligase activity toward luminal ER substrates. *Mol. Biol. Cell* **24**, 890–900 (2013).
  42. Sikorski, R. S. & Hieter, P. A system of shuttle vectors and yeast host strains designed for efficient manipulation of DNA in *Saccharomyces cerevisiae*. *Genetics* **122**, 19–27 (1989).
  43. Andreasson, C. Receptor-mediated endoproteolytic activation of two transcription factors in yeast. *Genes Dev.* **16**, 3158–3172 (2002).
  44. Omnus, D. J. & Ljungdahl, P. O. Latency of transcription factor Stp1 depends on a modular regulatory motif that functions as cytoplasmic retention determinant and nuclear degron. *Mol. Biol. Cell* **25**, 3823–3833 (2014).
  45. Iraqui, I., Vissers, S., Cartiaux, M. & Urrestarazu, A. Characterisation of *Saccharomyces cerevisiae* ARO8 and ARO9 genes encoding aromatic aminotransferases I and II reveals a new aminotransferase subfamily. *Mol. Gen. Genet.* **257**, 238–248 (1998).
  46. Brachmann, C. B. *et al.* Designer deletion strains derived from *Saccharomyces cerevisiae* S288C: a useful set of strains and plasmids for PCR-mediated gene disruption and other applications. *Yeast* **14**, 115–132 (1998).
